# Supplementary material for: Cloning a Chymotrypsin-Like 1 (CTRL-1) Protease cDNA from the Jellyfish Nemopilema nomurai
Source: PubMed Central journal article supplement (PMC4963838; doi:10.3390/toxins8070205), 2016-07-05
Supplement: toxins-08-00205-s001.pdf [file toxins-08-00205-s001.pdf]

# Supplementary Materials: Cloning a Chymotrypsin-Like 1 (CTRL-1) Protease cDNA from the Jellyfish *Nemopilema nomurai*

Yunwi Heo, Young Chul Kwon, Seong kyeong Bae, Duhyeon Hwang, Hye Ryeon Yang, Indu Choudhary, Hyunyoung Lee, Seungshic Yum, Kyoungsoon Shin, Won Duk Yoon, Changkeun Kang and Euikyung Kim

**ATGTTGGCAATACTCATTCTGGTCTGTTTCGTTGGCAGCAGTTGGCCAGC**<sub>GTAAGCACCTTGGTTAATTTGGCTTTGTTGAATAATCATTACAGAGA</sub>  
AGCTGTTAAGTATATATTGCATTATATCTAAGTACCAATGAGAATAATACTAAGTCCATCTGTTGTTGATACTGTCTTTTCCAAGTGATACCCATTTACAGATTTTGTGCATCCTTGAGTTTCCCA  
GATACTGATGACGGTCATTTTTTTGTCAGTTAAAACTGATGACAGGTATTTGTTGTTGCAAAATACAGCGACTTCTACCTTCCCCAAAATGGTGATCATAGATCTAGGATTATTGAGATGACATACA  
AGCATTATATCTCAAGGTAGAAAGAAATAACTGCAGCGACCATTATCATTAGCAAGTAGAGCAATGTAAGCTTCAAGGAACACCCAAACACAAAGCATTATTTCCGGTAATACGCAATATCATCA  
TGGCTTCTTCTCGTGTATCCCGTGTCTTGGTCTGCTCAGTTGCGACTAAACATTGTTTCATTACTAGAGCTGCTTGGTCTTAATATCAAATGCAGATTCTGAATACCTCCTAAATATATCACACGGCTTCT  
TGCAG**AATGTGGCGTTC**<sub>CCCGGATA</sub>**CGCGGCTAGTCGGGTCATTGGTGGCAGCACTGCGAGGCC**<sub>TGGTTCCTGGCC</sub>**TTGGCAA**  
**GTAGCCATCTACTACGACAACCGTTTTCATTGTGGAGGATCGTTGGTGAACGCCAACTGGGTTGTTACTGCTGCTCATTGCC**  
**TTGATAGAACCAGGATGAGCGGATTCACCATTGTTTTGG**<sub>TGAGTGGACTAATTTGCAATCATGTGTCATGGCTTCATATTAGATATCCAAGCAACGATGAGTCTTT</sub>  
AGTCTCAGCAAACCTCCAGTGGCTATTGGTTAAGGAACITTAGTTTGTGATCTTCTATCATAATCCAAGTTGGTATAGACTCAGCAGTGAGATTCTAATTTATGATCATTCCCTTTCTTAAGATAGA  
ACTGGCGGTCCATCCAGTGAGAAATAAACTGTTTGTATGCAACATTAATGCACCTGTAATAAGACAATGGTTTGAATTTCAATGTATTGTTATTGCAAAATACCATGTATTGCTAATTAGATGGGGG  
TACCACTGAGTACTATAGATAAGGTTAGAATACCAAGGCTGCACCTTGATACACAGCAGGACTTGTCTTGGACGAACATTGGAGACAGGAAAGAGGGAGAATGGGGGCTATTAAAGCAAATG  
TGAAGTACAGAGAGAGAACTTTGTTCAATAAAAGATAGTAGAAAGAAAAATAAAATGAGAGCATTGTATAGTATTGACTTCATTTCTCTTTAATAGCTAACATGTACCAACCCCTTTCAAATCCA  
ACGAAATGCTTTAAATCTTTTAAAGAATATGATTTTCACTCAAAAATGGGGCTCCTTATACTATACTACCTACAATACTGTTCTTTTTCTCGAGTCCCTCTTGTGAAATTTCAATATTGAC  
GAGATGATGTTATCTCTTTA**AG**<sub>GTGAGCACTACCGACAACAAAAGGAGGGAAGCGAGCAATATTTCAAAGCCAAGAGGGGCATTACCG</sub>  
**CATCCTCAGTACAACAAACAGCCGCTGGACAGCGACATCGCGCTCATCAAGCTGGATAGGCCAGCTCAGTTCAACAACCGA**  
**GTGCAGCCAGTCTGTCTGCCATCCACCTACAACAAGCCCCTTCCGGCCACCACCTGCTTCATCACTG**<sub>GTAAGGCGTGGCCAGATCCACG</sub>  
CTTTTACTCGAGAAGCGTATTTGAAAGAATTAAGTGTCTCTGAGACAATAAACAATGACACTAGTTGAAATCCATGGGGCTTATGGTTATCCTAAAAATGAGCATTAACTTTGTTGGAGTCTAG  
TGGCGATGTAGACCAGACTCAAGGGAGATTTGTCTCTATCCTTATATGAAAATTTGGTACTGTGCTTATCACTGTTAGAGATAACAAGGAAATATGCCTCTCCTTTAGCGTCTTAAAGGAG  
TCAGAAGAAAAAATTCCTGCTGGCAATCATTGAATACTTCTAGCATTAAAGCAATGGATTACTTCTGTATTCT**AG**<sub>GTTGGGGAAAGACATCACATCCCGGGTCTCAG</sub>  
**CTTACGTTCTCAACAATCACCCTCCGGTCTGTTGACAACAGAAGATGCCACGCCCTGAACAACCAAACTCGAATCG**  
**GCATCGCAGGCAACATGCTCTGCGCTGGTTTCGGGCCTAACGACATCCGAAGTGGTTGCCATGGAGATAGTGGTGGCCCAT**  
**TCGTATGCAAAAGTGGCAGCCAATGGTCCCTCCAGGGAGCAGTGAGCTGGGGCTCCGGACGTTGCAACACGCGAGATGCA**  
**TACTGTATTGCAAGGGTCACAACTTCGTGAGTTGGATCAACAAGTACATCAAATACTAG**

**Figure S1.** *Nemopilema nomurai* chymotrypsin-like 1 (CTRL-1) genomic DNA sequence (GenBank accession No. KU\_668697), composed of 2434 bp.
